# Supplementary material for: Iron-regulated small RNA expression as Neisseria gonorrhoeae FA 1090 transitions into stationary phase growth
Source: BMC Genomics. 2017 Apr 21;18:317. doi: 10.1186/s12864-017-3684-8 (PMC5399841; doi:10.1186/s12864-017-3684-8)
Supplement: Supplementary file 1 — Complete list of all reads in FA 1090 from Rockhopper analysis at 1, 2, 3, 4, and 5 hrs in Fe minus and Fe plus growth conditions. Representative growth curves for FA 1090, LJ001 nrrf mutant strain and NrrF complemented strain LJ002. (XLSX 302 kb) [file 12864_2017_3684_MOESM1_ESM.xlsx]

## Sheet: 1hr
Additional_file_Table_S1_RockHopper_analysis_1_2_3_4_5hrs_Fe-_Fe+
sRNA Transcription Start	sRNA Transcription Stop	Strand	RPKM 1hr_Fe_minus	RPKM 1hr_Fe_plus	pValue 1hr_Fe_minus vs 1hr_Fe_plus	qValue 1hr_Fe_minus vs 1hr_Fe_plus	Length (bp)
6325	6168	-	8128	3652	0.166581	0.674451	158
10971	11105	+	547	274	0.284756	0.796332	135
11757	11907	+	1386	1503	0.076606	0.513282	151
11979	12123	+	826	791	0.166874	0.674451	145
47992	47975	-	524	95	0.0805399	0.52351	18
48350	48205	-	704	404	0.940904	1	146
52385	52234	-	1644	780	0.745675	1	152
55738	55648	-	678	351	0.312501	0.822167	91
68507	68296	-	1153	638	0.881652	1	212
68624	68774	+	1902	1035	0.628255	1	151
69898	69748	-	767	718	0.184549	0.697728	151
130397	130592	+	2108	1625	0.0486604	0.437577	196
150357	150218	-	620	371	0.623065	1	140
155285	155456	+	1397	856	0.950583	1	172
185440	185420	-	1795	936	0.805903	1	21
241303	241451	+	2385	1327	0.347906	0.857951	149
243593	243687	+	577	380	0.210044	0.733306	95
252130	252165	+	503	263	0.840888	1	36
252947	252912	-	497	200	0.917276	1	36
275384	275532	+	1069	257	0.273438	0.793624	149
282808	282658	-	740	282	0.441234	0.943192	151
317846	317690	-	1066	515	0.712625	1	157
321745	321793	+	810	45	0.418387	0.919837	49
327509	327356	-	5954	1605	0.448372	0.946607	154
339143	339163	+	517	307	0.429954	0.934954	21
424934	425074	+	531	309	0.198525	0.721688	141
431675	431827	+	1482	1145	0.826003	1	153
432931	433007	+	570	334	0.415558	0.916987	77
433284	433396	+	297	434	0.00773224	0.163049	113
445041	445190	+	800	502	0.795397	1	150
446988	447200	+	2241	1474	0.0766722	0.513282	213
455120	455004	-	641	219	0.665223	1	117
465623	465479	-	545	275	0.35161	0.858258	145
484076	483870	-	869	522	0.294573	0.799795	207
514122	514272	+	986	457	0.834123	1	151
599324	599475	+	1268	804	0.496595	1	152
621744	621641	-	596	200	0.493342	0.998371	104
637363	637522	+	81704	27776	0.0644985	0.500019	160
661012	661202	+	4753	2598	0.435432	0.940849	191
677426	677573	+	568	179	0.659223	1	148
688531	688383	-	825	402	0.725633	1	149
700331	700481	+	1559	682	0.451897	0.950692	151
714791	714777	-	511	204	0.39679	0.90135	15
732172	732158	-	535	190	0.323599	0.831533	15
732886	732748	-	525	224	0.379399	0.885388	139
755065	755218	+	566	852	0.0070094	0.151049	154
808931	808903	-	513	139	0.247777	0.768719	29
833718	833804	+	626	326	0.352878	0.859556	87
841343	841182	-	775	681	0.220013	0.741703	162
846573	846722	+	1375	927	0.706197	1	150
847431	847221	-	11366	6872	0.0221123	0.303981	211
862950	863286	+	5555	14301	1.13033e-05	0.000932328	337
890402	890276	-	674	441	0.356818	0.861937	127
919933	919729	-	322	591	1.20826e-06	0.000160564	205
921108	920958	-	516	554	0.0134325	0.229504	151
956579	956413	-	2049	456	0.897637	1	167
957133	957283	+	809	308	0.431443	0.93734	151
966476	966382	-	639	435	0.163175	0.673073	95
976890	976804	-	516	251	0.628383	1	87
985761	985604	-	1595	2000	0.00217469	0.0658463	158
986362	986215	-	594	530	0.179279	0.694376	148
1010461	1010484	+	521	166	0.288555	0.797938	24
1021923	1022008	+	554	393	0.209848	0.733306	86
1025841	1025990	+	1150	759	0.287661	0.797497	150
1031165	1031310	+	622	384	0.758958	1	146
1033674	1033844	+	591	443	0.49912	1	171
1034583	1034697	+	566	560	0.0235992	0.310161	115
1036191	1036518	+	1032	622	0.513738	1	328
1072433	1072283	-	3458	3140	0.0112321	0.208272	151
1081530	1081380	-	929	334	0.414371	0.916877	151
1104240	1104091	-	901	345	0.442822	0.944221	150
1112942	1112930	-	497	221	0.404569	0.902732	13
1115896	1115739	-	26830	16484	0.291755	0.799347	158
1122710	1122890	+	12247	7543	0.0382813	0.399317	181
1123029	1123138	+	572	312	0.277158	0.793624	110
1128344	1128295	-	702	488	0.284006	0.796118	50
1170461	1170438	-	1288	1128	0.163718	0.673073	24
1172610	1172485	-	519	411	0.0831178	0.528998	126
1188077	1187927	-	1790	1149	0.82718	1	151
1217190	1217041	-	873	305	0.34921	0.858258	150
1218182	1218332	+	917	481	0.913539	1	151
1221161	1221010	-	6156	3249	0.492024	0.997919	152
1249336	1249484	+	597	368	0.685516	1	149
1257446	1257194	-	773	1357	0.000263352	0.0146497	253
1257995	1257842	-	28824	16870	0.183343	0.69743	154
1263482	1263448	-	1220	483	0.161545	0.669699	35
1284789	1284939	+	4281	2801	0.13535	0.62144	151
1285708	1285631	-	503	229	0.27538	0.793624	78
1304410	1304260	-	1049	781	0.272469	0.793624	151
1327708	1327559	-	4156	1571	0.607393	1	150
1342191	1342018	-	10416	518	1.40052e-21	4.78577e-19	174
1342419	1342400	-	511	41	3.84922e-06	0.000383638	20
1385689	1385553	-	321	511	0.00130573	0.047323	137
1389153	1389093	-	3194	1543	0.389026	0.890934	61
1408503	1408353	-	1898	740	0.953037	1	151
1418671	1418830	+	871	609	0.352991	0.859556	160
1419643	1419474	-	1054	698	0.386115	0.890502	170
1423020	1423092	+	2261	703	0.545401	1	73
1428762	1428887	+	606	332	0.242746	0.76401	126
1453121	1453099	-	464	447	0.130977	0.619999	23
1465196	1465165	-	7925	78	1.0672e-55	8.50914e-53	32
1466066	1466215	+	624	495	0.295262	0.800755	150
1481118	1480970	-	1408	783	0.508232	1	149
1482460	1482523	+	697	454	0.279159	0.793624	64
1482681	1482531	-	848	404	0.685787	1	151
1517505	1517489	-	664	350	0.729552	1	17
1544839	1544963	+	517	206	0.590905	1	125
1546682	1546765	+	534	394	0.204883	0.730942	84
1575760	1575732	-	510	338	0.367412	0.871874	29
1594965	1594816	-	1155	499	0.849955	1	150
1600601	1600452	-	848	286	0.32176	0.83153	150
1601595	1601744	+	820	460	0.967204	1	150
1608619	1608763	+	855	342	0.414778	0.916877	145
1614211	1614445	+	11510	4057	0.001574	0.0519825	235
1615135	1615148	+	501	185	0.233895	0.758099	14
1629334	1629290	-	1030	1322	0.0107473	0.206629	45
1644070	1643898	-	2785	1889	0.065776	0.500848	173
1649021	1648770	-	878	1189	0.00265474	0.0774408	252
1649571	1649418	-	29205	16754	0.136139	0.623838	154
1658491	1658342	-	819	520	0.766635	1	150
1712642	1712495	-	840	558	0.648461	1	148
1715465	1715316	-	1028	697	0.318273	0.827072	150
1748089	1748239	+	1290	991	0.703925	1	151
1751125	1751021	-	536	506	0.0478657	0.436935	105
1763023	1762831	-	3482	1356	0.388714	0.890934	193
1786698	1786838	+	759	514	0.697837	1	141
1788239	1788089	-	554	496	0.117909	0.603869	151
1788273	1788335	+	497	285	0.663424	1	63
1794837	1794958	+	505	151	0.0151046	0.247707	122
1813556	1813705	+	1030	807	0.292883	0.799347	150
1828625	1828598	-	9379	6607	0.99004	1	28
1830718	1830867	+	813	601	0.345958	0.857104	150
1831096	1830946	-	1522	1552	0.0218835	0.303701	151
1843672	1843570	-	560	291	0.329412	0.836705	103
1844930	1844779	-	938	430	0.725104	1	152
1848522	1848317	-	3892	3335	0.113005	0.588908	206
1853237	1853274	+	503	284	0.872942	1	38
1872160	1871877	-	621	430	0.422685	0.924329	284
1872727	1872570	-	27592	15916	0.0824283	0.528602	158
1878209	1878181	-	1066	492	0.506656	1	29
1882289	1882353	+	514	488	0.118585	0.604454	65
1883827	1883780	-	89	474	7.18177e-15	1.90875e-12	48
1887018	1886946	-	549	301	0.561738	1	73
1890491	1890336	-	1289	772	0.512713	1	156
1905168	1905024	-	555	237	0.731097	1	145
1914308	1914510	+	958	825	0.679176	1	203
1914636	1914725	+	469	482	0.0656402	0.500848	90
1922098	1922248	+	2018	1144	0.491284	0.997581	151
1924427	1924668	+	14964	26037	0.0096631	0.18946	242
1929631	1929781	+	1149	1087	0.593559	1	151
1939004	1939072	+	517	190	0.244097	0.76401	69
1962540	1962393	-	884	802	0.189379	0.704244	148
1976125	1975968	-	21176	241	1.41369e-88	1.69077e-85	158
1981302	1981152	-	1220	1429	0.253847	0.779463	151
1996363	1996515	+	985	262	0.265841	0.789926	153
2014617	2014738	+	555	419	0.0957027	0.555633	122
2015497	2015639	+	695	375	0.844281	1	143
2015861	2016003	+	506	275	0.242752	0.76401	143
2036124	2036274	+	3390	1874	0.150922	0.655184	151
2037116	2037096	-	546	337	0.394508	0.898726	21
2038113	2037933	-	2478	1157	0.106583	0.570983	181
2038498	2038648	+	605	478	0.281619	0.793624	151
2038851	2038978	+	761	404	0.82546	1	128
2097136	2096994	-	626	284	0.777609	1	143
2101757	2101558	-	1175	177	0.655241	1	200
2105542	2105392	-	521	515	0.0322128	0.363458	151
2120884	2121025	+	790	271	0.349869	0.858258	142
2144430	2144406	-	635	165	0.146856	0.646968	25

## Sheet: 2hr
sRNA Transcription Start	sRNA Transcription Stop	Strand	RPKM 2hr_Fe_minus	RPKM 2hr_Fe_plus	pValue 2hr_Fe_minus vs 2hr_Fe_plus	qValue 2hr_Fe_minus vs 2hr_Fe_plus	Length (bp)
6324	6168	-	5986	5100	0.460356	1	158
10966	11116	+	1029	206	0.474358	1	152
11757	11907	+	817	1065	0.0642841	0.735463	152
11980	12123	+	1183	232	0.508286	1	145
52384	52239	-	872	439	0.515289	1	147
68476	68314	-	781	672	0.214864	0.923738	164
68624	68774	+	1386	975	0.989112	1	152
130402	130592	+	1398	1442	0.6473	1	192
155285	155437	+	987	545	0.459745	1	154
185451	185427	-	853	1631	0.129471	0.832175	26
241303	241450	+	1332	1075	0.839079	1	149
275412	275525	+	588	336	0.429701	1	115
317842	317690	-	961	239	0.658161	1	154
321745	321811	+	1229	14	3.27356e-21	8.46761e-19	68
327509	327359	-	4377	2520	0.628766	1	152
431675	431827	+	990	1402	0.0851543	0.767663	154
445042	445190	+	680	235	0.615206	1	150
463966	463944	-	631	429	0.319026	0.969571	24
484019	483909	-	608	539	0.931947	1	112
514124	514268	+	604	331	0.830257	1	146
553703	553555	-	583	599	0.281045	0.946518	150
599326	599474	+	666	505	0.372727	1	150
637363	637520	+	61533	16366	0.00363148	0.140901	159
688505	688387	-	556	412	0.740493	1	120
700331	700481	+	541	717	0.165068	0.878827	152
755154	755182	+	457	581	0.87338	1	30
841209	841199	-	504	430	0.380976	1	12
846573	846722	+	829	955	0.0892714	0.767663	151
847428	847251	-	8374	6086	0.583116	1	179
862941	863287	+	4258	15678	0.000930448	0.0442058	348
871040	871107	+	602	404	0.289784	0.955547	69
890402	890276	-	639	278	0.403772	1	128
956563	956413	-	1605	615	0.840979	1	152
957133	957283	+	466	660	0.188628	0.907286	152
985761	985610	-	1159	1318	0.321504	0.970821	153
1021910	1022008	+	334	564	0.136158	0.847531	100
1025841	1025990	+	738	554	0.338618	0.98167	151
1033674	1033820	+	395	532	0.293616	0.956905	148
1034589	1034637	+	584	341	0.372115	1	50
1036212	1036241	+	367	525	0.74586	1	31
1036309	1036511	+	753	485	0.371109	1	204
1057848	1057795	-	578	188	0.161094	0.8773	55
1072433	1072283	-	3963	6896	0.0821188	0.757965	152
1081528	1081382	-	536	275	0.51507	1	148
1104240	1104092	-	577	189	0.29649	0.958454	150
1115891	1115739	-	23995	7138	0.0299705	0.548668	154
1122710	1122886	+	12322	12747	0.460555	1	178
1123029	1123057	+	548	410	0.421317	1	30
1128344	1128295	-	820	353	0.22485	0.923738	51
1188077	1187927	-	1353	2043	0.0401577	0.61912	152
1217188	1217041	-	585	181	0.274531	0.944779	149
1218182	1218332	+	958	473	0.504154	1	152
1221161	1221010	-	3384	2575	0.602942	1	153
1257430	1257198	-	990	602	0.755876	1	234
1257994	1257842	-	24089	7284	0.0274174	0.536368	154
1284789	1284939	+	2318	2861	0.208804	0.923738	152
1304410	1304260	-	599	680	0.195496	0.918256	152
1327708	1327560	-	2991	1247	0.00397996	0.149441	150
1341481	1341432	-	528	54	0.000167332	0.00973875	51
1342191	1342018	-	7577	416	2.42037e-23	7.04328e-21	175
1348856	1348841	-	544	468	0.481118	1	17
1389153	1389093	-	1339	3389	0.00283161	0.115649	62
1408503	1408353	-	930	835	0.175167	0.887623	152
1418753	1418820	+	578	546	0.417457	1	69
1419643	1419475	-	997	573	0.427039	1	170
1481118	1480970	-	767	504	0.400117	1	150
1482489	1482522	+	453	501	0.949352	1	35
1482681	1482531	-	518	653	0.215084	0.923738	152
1594965	1594821	-	653	421	0.688083	1	146
1601595	1601744	+	823	462	0.456677	1	151
1608620	1608759	+	373	555	0.350702	0.986033	141
1614211	1614445	+	7181	4503	0.618298	1	236
1638477	1638427	-	551	290	0.291277	0.956905	52
1644070	1643914	-	2377	3454	0.187913	0.905718	158
1649006	1648773	-	1072	595	0.579535	1	235
1649570	1649418	-	24606	7340	0.0228317	0.470373	154
1658491	1658342	-	842	287	0.918141	1	151
1712640	1712495	-	663	298	0.83541	1	147
1715465	1715316	-	646	661	0.213332	0.923738	151
1748089	1748239	+	860	1103	0.0773883	0.755852	152
1763021	1762831	-	2296	1670	0.478067	1	192
1786702	1786835	+	563	251	0.326473	0.971005	135
1794830	1794977	+	693	240	0.638812	1	149
1813556	1813704	+	655	648	0.22919	0.923738	150
1830718	1831056	+	269	832	1.64886e-05	0.00119955	340
1844928	1844783	-	676	760	0.150245	0.856201	147
1848522	1848317	-	1963	2080	0.90859	1	207
1882248	1882265	+	547	302	0.310429	0.966147	19
1914311	1914461	+	570	721	0.163459	0.878827	152
1922099	1922248	+	1259	935	0.744828	1	151
1924425	1924744	+	9252	49379	0.0168509	0.388406	321
1929631	1929781	+	701	1266	0.0108446	0.293562	152
1962540	1962391	-	370	1419	8.71363e-06	0.000724476	151
1976125	1975956	-	19789	125	5.13052e-97	5.97193e-94	171
1981301	1981152	-	609	852	0.0839284	0.763224	151
1996366	1996515	+	321	547	0.246376	0.923738	151
2014588	2014738	+	420	988	0.0157198	0.377275	152
2015497	2015640	+	444	687	0.159783	0.8773	145
2016505	2016302	-	1115	1118	0.807226	1	205
2038113	2037891	-	1279	1557	0.113297	0.819284	224
2038521	2038688	+	274	912	0.00558799	0.188534	169
2038852	2038978	+	515	605	0.401508	1	128
2101755	2101558	-	1376	278	0.345861	0.983716	199
2120891	2121022	+	347	566	0.457269	1	133

## Sheet: 3hr
sRNA Transcription Start	sRNA Transcription Stop	Strand	RPKM 3hr_Fe_minus	RPKM 3hr_Fe_plus	pValue 3hr_Fe_minus vs 3hr_Fe_plus	qValue 3hr_Fe_minus vs 3hr_Fe_plus	Length (bp)
6324	6161	-	9118	3165	0.0921563	1	164
10967	11120	+	641	237	0.297155	1	154
11757	11907	+	1558	965	0.455462	1	151
11980	12122	+	628	210	0.28036	1	143
15899	15966	+	552	254	0.370022	1	68
26979	26951	-	495	92	0.780857	1	29
48350	48200	-	247	701	0.750844	1	151
52385	52239	-	736	683	0.502665	1	147
55800	55594	-	900	383	0.588944	1	207
68506	68296	-	653	697	0.675862	1	211
68624	68785	+	1826	1946	0.992675	1	162
97106	97071	-	495	305	0.437058	1	36
118228	118370	+	159	1066	0.00199175	0.0893335	143
118458	118516	+	553	24	0.922653	1	59
130414	130589	+	1073	141	0.144049	1	176
139654	139551	-	110	524	0.295712	1	104
150352	150220	-	502	218	0.327672	1	133
155285	155453	+	877	505	0.54396	1	169
166807	166674	-	553	211	0.302071	1	134
167094	167070	-	101	478	0.857117	1	25
186157	186306	+	636	435	0.438896	1	150
197670	197514	-	288	786	0.769805	1	157
199902	199752	-	328	940	0.21488	1	151
229797	229942	+	601	255	0.328528	1	146
241303	241450	+	1222	395	0.674418	1	148
275384	275529	+	564	132	0.217973	1	146
282808	282658	-	1464	244	0.81477	1	151
317837	317696	-	625	167	0.239732	1	142
321745	321818	+	1182	32	2.87317e-09	3.47941e-07	74
323185	322968	-	166	684	0.208604	1	218
327509	327282	-	5782	2394	0.188952	1	228
336748	336808	+	26	491	0.00327047	0.132379	61
336872	336893	+	71	510	0.876174	1	22
339837	339973	+	93	512	0.0286133	0.700014	137
353244	353267	+	497	42	0.890804	1	24
370805	370772	-	2659	67	9.03633e-10	1.28741e-07	34
419861	419907	+	30	480	1.60239e-07	1.61708e-05	47
424934	425084	+	290	1083	0.0894892	1	151
431675	431827	+	2602	1471	0.246844	1	153
445040	445196	+	785	1311	0.174875	1	157
446988	447203	+	2718	1079	0.0922821	1	216
457188	457082	-	670	203	0.258856	1	107
481434	481332	-	58	514	0.0028275	0.120144	103
484059	483879	-	676	435	0.441123	1	181
514122	514271	+	634	430	0.437033	1	150
572472	572570	+	110	507	0.578392	1	99
599324	599479	+	1545	301	0.771794	1	156
632415	632347	-	1336	488	0.296618	1	69
637363	637523	+	100643	40109	0.191103	1	161
638138	638162	+	1094	474	0.359411	1	25
667327	667258	-	1022	786	0.445791	1	70
677426	677574	+	508	553	0.519427	1	149
700331	700481	+	1068	763	0.464899	1	151
728601	728589	-	354	762	0.726705	1	13
755065	755220	+	898	490	0.567779	1	156
771832	771684	-	28	719	6.20035e-12	1.3652e-09	149
794189	794342	+	20	1375	2.59353e-49	2.09384e-46	154
822586	822599	+	497	293	0.55882	1	14
829308	829213	-	77	488	0.0155801	0.449227	96
833654	833804	+	777	533	0.445699	1	151
841343	841194	-	633	476	0.459893	1	150
846573	846722	+	1437	518	0.609812	1	150
847431	847222	-	6314	2071	0.0691566	1	210
852410	852433	+	556	156	0.707306	1	24
890403	890257	-	608	667	0.54234	1	147
921108	920958	-	744	325	0.332817	1	151
925875	926025	+	622	608	0.517403	1	151
952410	952386	-	545	67	0.851617	1	25
955569	955684	+	247	476	0.696748	1	116
955573	955501	-	98	495	0.250583	1	73
956101	955951	-	1010	467	0.599973	1	151
956563	956413	-	1218	188	0.164165	1	151
957133	957289	+	1409	474	0.625802	1	157
985761	985610	-	944	719	0.47009	1	152
992641	992676	+	2580	168	0.000450007	0.0253469	36
1000557	1000517	-	141	472	0.775608	1	41
1006100	1006129	+	3407	59	7.07942e-11	1.39322e-08	30
1021875	1022008	+	558	174	0.265021	1	134
1021893	1021827	-	462	116	0.746637	1	67
1025841	1025990	+	696	355	0.364938	1	150
1028698	1028712	+	485	29	0.911235	1	15
1031165	1031308	+	466	338	0.434384	1	144
1032998	1033058	+	335	511	0.63282	1	61
1033596	1033824	+	543	919	0.172342	1	229
1036102	1036519	+	884	1170	0.204023	1	418
1069329	1069476	+	210	610	0.76135	1	148
1072433	1072283	-	4480	742	0.000778514	0.0397528	151
1076626	1076657	+	518	298	0.420784	1	32
1099715	1099704	-	463	126	0.732665	1	12
1111952	1111905	-	467	219	0.373162	1	48
1113382	1113370	-	448	160	0.674915	1	13
1115897	1115711	-	28998	8117	0.0735108	1	187
1122064	1122154	+	131	518	0.996885	1	91
1122710	1123476	+	3226	2111	0.496195	1	767
1128344	1128296	-	432	511	0.582394	1	49
1135959	1135976	+	451	202	0.619308	1	18
1172616	1172466	-	364	884	0.280929	1	151
1177740	1177854	+	211	475	0.711998	1	115
1188077	1187927	-	3446	1935	0.621247	1	151
1198344	1198282	-	569	263	0.37215	1	63
1198562	1198522	-	940	1455	0.64819	1	41
1218181	1218332	+	1098	599	0.537346	1	152
1221161	1221010	-	4015	771	0.00328489	0.132379	152
1232059	1231913	-	118	730	0.0083544	0.306581	147
1249337	1249489	+	189	811	0.934554	1	153
1257402	1257197	-	1048	711	0.707619	1	206
1258000	1257836	-	32725	9174	0.0730829	1	165
1258351	1258262	-	8470	18963	0.0104023	0.345127	90
1281293	1281443	+	1118	1039	0.958185	1	151
1284789	1284939	+	2718	2449	0.362392	1	151
1285716	1285616	-	467	267	0.414305	1	101
1295029	1294891	-	118	528	0.237662	1	139
1296596	1296734	+	532	197	0.295867	1	139
1304410	1304260	-	654	581	0.492911	1	151
1308534	1308682	+	662	424	0.421541	1	149
1317943	1317921	-	557	144	0.723633	1	23
1327708	1327559	-	2580	993	0.0924655	1	150
1342191	1342022	-	3175	467	0.00844278	0.306581	170
1348899	1348858	-	578	216	0.32591	1	42
1372472	1372425	-	465	223	0.37801	1	48
1389198	1389093	-	509	483	0.521775	1	106
1390354	1390381	+	89	630	0.895195	1	28
1408503	1408353	-	986	801	0.444456	1	151
1418659	1418530	-	616	254	0.32124	1	130
1418753	1418825	+	420	690	0.665375	1	73
1419643	1419477	-	903	510	0.547096	1	167
1428762	1428910	+	567	119	0.200399	1	149
1454052	1453902	-	298	857	0.976769	1	151
1465195	1465165	-	3519	25	8.7505e-16	2.35486e-13	31
1480882	1480750	-	286	601	0.705345	1	133
1481118	1480941	-	1894	4459	0.0241197	0.660811	178
1481645	1481616	-	462	119	0.721369	1	30
1482459	1482619	+	294	1003	0.0943203	1	161
1482681	1482531	-	1266	871	0.80718	1	151
1498860	1498819	-	692	297	0.357804	1	42
1503151	1503132	-	472	202	0.627871	1	20
1507170	1507150	-	506	136	0.721513	1	21
1546700	1546758	+	168	481	0.740983	1	59
1569987	1570131	+	422	627	0.586082	1	145
1570258	1570399	+	691	649	0.505582	1	142
1594965	1594816	-	570	919	0.275172	1	150
1601594	1601744	+	1152	515	0.588656	1	151
1603456	1603341	-	667	368	0.381332	1	116
1614211	1614449	+	12049	5462	0.284176	1	239
1614879	1615006	+	265	642	0.733123	1	128
1615146	1615235	+	421	471	0.578376	1	90
1629363	1629347	-	593	857	0.632651	1	17
1638483	1638441	-	514	205	0.336785	1	43
1648963	1648772	-	983	619	0.595122	1	192
1649576	1649408	-	31998	9242	0.0916653	1	169
1649927	1649838	-	8959	19232	0.0119441	0.376016	90
1658491	1658353	-	516	328	0.405847	1	139
1712644	1712496	-	504	814	0.470777	1	149
1715465	1715316	-	701	503	0.442379	1	150
1748089	1748239	+	1450	1004	0.63894	1	151
1763022	1762833	-	2015	1277	0.309783	1	190
1776000	1776064	+	632	44	0.0252849	0.678076	65
1786707	1786824	+	450	100	0.218851	1	118
1788263	1788335	+	477	262	0.412	1	73
1794828	1794978	+	964	256	0.252481	1	151
1808955	1808873	-	5126	608	0.0728257	1	83
1813556	1813705	+	737	295	0.312168	1	150
1824195	1824179	-	466	60	0.850733	1	17
1830718	1831057	+	829	560	0.37832	1	340
1831114	1831123	+	483	289	0.553012	1	10
1843719	1843570	-	97	555	0.0251969	0.678076	150
1844928	1844817	-	556	418	0.452368	1	112
1848522	1848317	-	1865	1447	0.879421	1	206
1859012	1858994	-	462	75	0.820094	1	19
1864109	1864134	+	561	187	0.676995	1	26
1872027	1871838	-	326	1731	2.45348e-05	0.00185698	190
1873079	1872990	-	8815	19099	0.011799	0.376016	90
1890491	1890335	-	1403	808	0.923472	1	157
1910174	1910378	+	10110	3317	0.0873293	1	205
1914364	1914459	+	288	577	0.702784	1	96
1922098	1922248	+	1490	688	0.873436	1	151
1924431	1924693	+	11869	8289	0.523878	1	263
1929631	1929781	+	997	518	0.57031	1	151
1947489	1947424	-	520	240	0.372196	1	66
1976125	1975949	-	28792	121	3.66502e-97	8.87669e-94	177
1981302	1981151	-	2000	3701	0.1039	1	152
1996458	1996509	+	457	271	0.429226	1	52
2014589	2014739	+	923	836	0.429382	1	151
2015490	2015640	+	666	636	0.507722	1	151
2015861	2015993	+	464	132	0.25547	1	133
2021510	2021449	-	702	185	0.253165	1	62
2036124	2036274	+	725	269	0.295939	1	151
2038499	2038673	+	753	904	0.846105	1	175
2038837	2038992	+	817	800	0.557813	1	156
2057041	2056986	-	448	160	0.316494	1	56
2072407	2072505	+	1267	16	9.18455e-17	3.17785e-14	99
2072851	2072871	+	870	28	0.953818	1	21
2080340	2080413	+	67	529	0.0427113	0.92861	74
2101778	2101598	-	969	180	0.191926	1	181
2105542	2105399	-	497	165	0.274657	1	144
2105717	2105763	+	677	196	0.273158	1	47
2120882	2121023	+	615	435	0.446681	1	142
2133540	2133632	+	553	253	0.359909	1	93

## Sheet: 4hr
sRNA Transcription Start	sRNA Transcription Stop	Strand	RPKM 4hr_Fe_minus	RPKM 4hr_Fe_plus	pValue 4hr_Fe_minus vs 4hr_Fe_plus	qValue 4hr_Fe_minus vs 4hr_Fe_plus	Length (bp)
6324	6172	-	3968	3322	0.749364	1	153
10970	11115	+	678	156	0.922334	1	146
11757	11907	+	491	1211	0.437958	1	151
12021	12033	+	334	494	0.664458	1	13
38123	38276	+	141	722	0.616523	1	154
48350	48200	-	184	766	0.573803	1	151
52385	52234	-	180	1068	0.656457	1	152
55800	55613	-	310	948	0.484487	1	188
59947	59957	+	51	778	0.83366	1	11
61384	61496	+	5	592	0.00103324	0.0387544	113
68506	68293	-	126	945	0.68023	1	214
68624	68786	+	515	3033	0.893104	1	163
68837	68691	-	62	549	0.734132	1	147
69145	69227	+	5	528	0.712711	1	83
75394	75513	+	26	573	0.856086	1	120
117230	117084	-	51	701	0.80653	1	147
118228	118366	+	69	836	0.782452	1	139
130397	130566	+	1831	267	0.0463489	1	170
139675	139525	-	27	1004	0.39529	1	151
155302	155456	+	273	1163	0.588102	1	155
166784	166684	-	34	497	0.811116	1	101
179500	179549	+	186	591	0.511104	1	50
186157	186306	+	362	647	0.370039	1	150
197688	197388	-	13	936	1.12245e-05	0.000780227	301
199902	199752	-	11	1463	7.48332e-13	1.01357e-10	151
207910	207924	+	92	508	0.648621	1	15
241304	241450	+	399	602	0.327053	1	147
243125	243279	+	1213	9046	0.136722	1	155
243539	243661	+	124	526	0.572359	1	123
252125	252273	+	192	700	0.541865	1	149
252989	252863	-	114	559	0.606656	1	127
268098	268067	-	47	1102	0.871245	1	32
321227	321236	+	6885	54	9.11277e-18	1.48113e-15	10
321786	321834	+	1198	51	7.06039e-05	0.00409839	49
323185	322967	-	21	941	0.0816679	1	219
327510	327358	-	1640	14546	0.0232729	0.584942	153
336748	336944	+	29	620	0.853834	1	197
339203	339293	+	33	514	0.822215	1	91
339824	339974	+	17	843	0.0253132	0.617136	151
369019	369062	+	0	588	0	0	44
370805	370772	-	1214	84	0.00745963	0.221788	34
395064	395080	+	109	493	0.602234	1	17
414014	413957	-	27	562	0.856513	1	58
415872	415973	+	29	512	0.835713	1	102
419861	420005	+	5	534	0.000373889	0.0165735	145
424933	425084	+	106	1422	0.763364	1	152
429611	429657	+	802	1160	0.320667	1	47
431675	431825	+	689	1455	0.38206	1	151
436675	436528	-	189	1019	0.635988	1	148
442200	442336	+	16	604	0.893468	1	137
445040	445196	+	448	1764	0.503985	1	157
445188	445038	-	35	739	0.854236	1	151
446988	447206	+	1667	1821	0.23832	1	219
455120	455004	-	102	584	0.640895	1	117
463484	463473	-	687	6165	0.739339	1	12
465623	465474	-	60	972	0.820416	1	150
484058	483851	-	413	954	0.382578	1	208
514144	514272	+	382	640	0.352272	1	129
568337	568193	-	224	682	0.499264	1	145
571078	571225	+	45	622	0.805933	1	148
572436	572636	+	48	1112	0.83417	1	201
572917	573062	+	7	782	1.69224e-05	0.00111505	146
573345	573392	+	56	520	0.749417	1	48
599325	599476	+	1001	278	0.0825139	1	152
618594	618886	+	11	1009	4.24721e-08	4.14188e-06	293
637363	637523	+	17427	99429	0.760783	1	161
667286	667258	-	212	753	0.541853	1	29
668783	668773	-	14	1031	0.955166	1	11
677426	677575	+	143	1539	0.732294	1	150
700331	700481	+	261	1826	0.660375	1	151
728601	728586	-	43	610	0.822081	1	16
746054	746202	+	82	720	0.721161	1	149
746903	746795	-	120	496	0.56728	1	109
751295	751361	+	1528	196	5.04932e-05	0.00315647	67
755065	755268	+	158	803	0.630309	1	204
756301	756316	+	28	482	0.847138	1	16
757336	757436	+	10	544	0.917816	1	101
762864	762794	-	20	709	0.895577	1	71
785159	785179	+	31	1081	0.909524	1	21
794031	794098	+	0	509	0.994822	1	68
794151	794342	+	22	2139	8.32006e-09	9.6592e-07	192
829308	829212	-	39	559	0.808225	1	97
833654	833883	+	97	1123	0.738745	1	230
841343	841191	-	561	853	0.336841	1	153
843095	842953	-	25	2152	2.53591e-08	2.57606e-06	143
846573	846775	+	851	761	0.96984	1	203
846845	846862	+	126	510	0.576279	1	18
847062	847212	+	68	794	0.772078	1	151
847425	847221	-	4123	3174	0.445479	1	205
862941	863286	+	3166	5481	0.3396	1	346
890405	890254	-	130	1442	0.738746	1	152
924881	925031	+	275	1120	0.418105	1	151
953680	953575	-	12	531	0.908492	1	106
955401	955432	+	33	500	0.827541	1	32
955616	955469	-	27	679	0.862805	1	148
956096	956005	-	93	519	0.644153	1	92
956680	956413	-	567	685	0.678423	1	268
957147	957283	+	212	641	0.49499	1	137
966475	966438	-	164	491	0.500271	1	38
976910	976774	-	143	732	0.615238	1	137
985760	985611	-	334	794	0.554991	1	150
1006100	1006129	+	1868	205	0.00015103	0.00751451	30
1021783	1021640	-	36	615	0.832815	1	144
1025841	1025990	+	362	638	0.365949	1	150
1031199	1031314	+	161	567	0.528932	1	116
1032942	1033118	+	150	791	0.626085	1	177
1033598	1033918	+	249	1421	0.659693	1	321
1034543	1034736	+	79	1348	0.794916	1	194
1051763	1051909	+	11	873	0.000175603	0.00823309	147
1069329	1069478	+	86	1057	0.77021	1	150
1072433	1072283	-	2634	1017	0.000631551	0.0248342	151
1122013	1122208	+	55	848	0.804707	1	196
1172616	1172466	-	99	1885	0.870796	1	151
1188077	1187927	-	749	3920	0.56736	1	151
1218183	1218331	+	213	581	0.4704	1	149
1221161	1221015	-	1770	736	0.20498	1	147
1231121	1231106	-	5	488	0.964196	1	16
1231635	1231445	-	27	676	0.866774	1	191
1232059	1231867	-	50	1080	0.832574	1	193
1249332	1249495	+	42	1110	0.869663	1	164
1257429	1257198	-	166	822	0.602013	1	232
1258000	1257840	-	7508	21610	0.474306	1	161
1263498	1263393	-	579	5280	0.912837	1	106
1266166	1266238	+	30	479	0.830582	1	73
1266413	1266531	+	31	514	0.825293	1	119
1284789	1285015	+	1792	3089	0.338633	1	227
1285734	1285587	-	114	770	0.671855	1	148
1295035	1294877	-	21	1387	0.000116087	0.00628932	159
1304410	1304260	-	368	959	0.527552	1	151
1308619	1308672	+	230	482	0.407458	1	54
1319876	1319909	+	4	520	0.964995	1	34
1342245	1342022	-	1581	751	0.00271306	0.094492	224
1343584	1343520	-	1835	33	2.77933e-18	4.84e-16	65
1385405	1385368	-	1443	61	0.000306654	0.0141061	38
1385690	1385544	-	9	589	0.00840361	0.238232	147
1389198	1389164	-	52	816	0.829068	1	35
1408503	1408353	-	626	932	0.651548	1	151
1419627	1419473	-	178	1220	0.668719	1	155
1454052	1453902	-	51	648	0.793508	1	151
1465195	1465165	-	3717	85	1.39562e-19	2.61732e-17	31
1466066	1466215	+	207	662	0.511506	1	150
1481127	1480559	-	74	5593	9.34441e-29	2.27817e-26	569
1481766	1481524	-	31	764	0.860883	1	243
1482373	1482625	+	115	1576	0.757913	1	253
1517525	1517667	+	178	581	0.508905	1	143
1520774	1520895	+	29	789	0.866382	1	122
1546630	1546768	+	15	670	0.817004	1	139
1553988	1554128	+	87	528	0.650843	1	141
1569946	1569892	-	40	482	0.792693	1	55
1570258	1570399	+	168	686	0.562872	1	142
1591872	1591804	-	159	1268	0.70891	1	69
1594965	1594816	-	88	1379	0.783021	1	150
1601594	1601744	+	174	825	0.601634	1	151
1614211	1614445	+	2273	9483	0.771878	1	235
1614888	1615038	+	114	684	0.648673	1	151
1615100	1615254	+	113	606	0.623007	1	155
1615505	1615518	+	11	489	0.93199	1	14
1615841	1615928	+	32	597	0.844813	1	88
1616243	1616378	+	30	784	0.866574	1	136
1625533	1625429	-	28	527	0.843097	1	105
1627533	1627522	-	61	662	0.781584	1	12
1629279	1629236	-	12216	3794	6.55024e-07	5.50672e-05	44
1633925	1633886	-	188	7394	0.035425	0.822534	40
1643067	1642949	-	26	564	0.85604	1	119
1643258	1643125	-	24	617	0.864086	1	134
1649004	1648773	-	225	846	0.531114	1	232
1649576	1649416	-	7322	21765	0.465938	1	161
1655073	1654968	-	710	5336	0.81176	1	106
1658491	1658342	-	239	588	0.444531	1	150
1712644	1712494	-	35	2166	0.000673364	0.0260581	151
1715465	1715316	-	333	673	0.400652	1	150
1748089	1748239	+	559	1096	0.594144	1	151
1758281	1758295	+	5	678	0.973467	1	15
1788263	1788396	+	100	580	0.641057	1	134
1801980	1801913	-	161	2980	0.808845	1	68
1808955	1808873	-	1481	293	0.926881	1	83
1813570	1813695	+	230	502	0.415014	1	126
1830695	1831059	+	221	2033	0.101456	1	365
1843719	1843570	-	12	1419	9.73256e-10	1.1864e-07	150
1844931	1844783	-	238	906	0.559868	1	149
1848069	1847964	-	9	518	0.982197	1	106
1848522	1848314	-	690	3729	0.563768	1	209
1871550	1871400	-	43	751	0.836737	1	151
1872168	1871877	-	130	835	0.646699	1	292
1872728	1872566	-	7276	21759	0.428234	1	163
1878225	1878120	-	660	5465	0.805637	1	106
1878563	1878548	-	36	945	0.892393	1	16
1882251	1882377	+	212	1985	0.711016	1	127
1890491	1890339	-	768	1374	0.35379	1	153
1910174	1910344	+	7206	4850	0.0264005	0.631023	171
1914309	1914510	+	70	1329	0.990875	1	202
1922098	1922248	+	336	1405	0.552439	1	151
1924429	1924665	+	12616	20116	0.309699	1	237
1929631	1929781	+	570	928	0.644892	1	151
1976122	1975949	-	21263	266	2.66228e-74	9.27233e-72	174
1981302	1981152	-	427	4934	0.0992101	1	151
1996365	1996509	+	85	568	0.671351	1	145
2013845	2013995	+	28	639	0.859757	1	151
2014588	2014765	+	443	1222	0.423592	1	178
2015469	2015647	+	96	2163	0.0502701	1	179
2015861	2015968	+	58	526	0.742973	1	108
2036995	2037116	+	50	540	0.7704	1	122
2038113	2037960	-	1787	2075	0.240756	1	154
2038424	2038688	+	191	1735	0.681067	1	265
2038828	2039002	+	148	2083	0.770113	1	175
2040877	2041015	+	45	612	0.806143	1	139
2041247	2041437	+	65	979	0.785231	1	191
2043068	2043218	+	4	823	3.65742e-12	4.69305e-10	151
2043992	2044125	+	3	496	0.000153641	0.00751451	134
2101747	2101614	-	662	99	0.000756784	0.0288287	134
2105542	2105395	-	237	545	0.428481	1	148
2114345	2114195	-	99	930	0.732471	1	151
2120924	2121022	+	211	508	0.438499	1	99
2146261	2146384	+	17	590	0.891734	1	124

## Sheet: 5hr
sRNA Transcription Start	sRNA Transcription Stop	Strand	RPKM 5hr_Fe_minus	RPKM 5hr_Fe_plus	pValue 5hr_Fe_minus vs 5hr_Fe_plus	qValue 5hr_Fe_minus vs 5hr_Fe_plus	Length (bp)
4047	4195	+	406	0	1	1	149
6324	6160	-	5797	3063	0.199312	1	165
10925	11182	+	2900	82	3.51159e-15	3.83642e-13	258
11757	11907	+	1175	1125	0.66422	1	151
11980	12123	+	1062	310	0.868913	1	144
38043	38198	+	400	747	0.484844	1	156
38249	38261	+	71	397	0.738929	1	13
44231	44379	+	37	693	0.888848	1	149
48351	48148	-	279	1334	0.686779	1	204
48612	48484	-	33	511	0.876984	1	129
49338	49327	-	77	726	0.824414	1	12
52387	52229	-	326	1621	0.69611	1	159
55757	55650	-	343	457	0.403614	1	108
60937	60876	-	17	416	0.918627	1	62
61349	61499	+	17	614	0.922916	1	151
68120	68008	-	71	414	0.738998	1	113
68530	68270	-	696	1550	0.469781	1	261
68612	68815	+	1287	4150	0.546654	1	204
68827	68639	-	89	526	0.741101	1	189
71017	70959	-	83	437	0.726785	1	59
73515	73373	-	35	745	0.900212	1	143
74340	74098	-	162	508	0.612784	1	243
117277	117077	-	424	898	0.520599	1	201
118228	118374	+	51	5187	4.75517e-24	7.33416e-22	147
119718	119695	-	35	408	0.846024	1	24
130397	130592	+	3346	193	9.65948e-06	0.000516881	196
135801	135845	+	780	195	0.88367	1	45
137282	137133	-	100	537	0.717627	1	150
139701	139525	-	156	1167	0.78385	1	177
141782	141636	-	17	549	0.919539	1	147
154696	154793	+	388	141	0.841298	1	98
155297	155454	+	575	1239	0.47419	1	158
162461	162608	+	17	675	0.850976	1	148
167188	167061	-	71	479	0.761418	1	128
179517	179548	+	327	406	0.386891	1	32
185461	185441	-	573	183	0.858749	1	21
195768	195663	-	35	437	0.854212	1	106
195928	195909	-	0	416	1	1	20
196508	196241	-	17	402	0.903935	1	268
196924	196877	-	17	397	0.901598	1	48
197689	197368	-	44	1771	2.55193e-07	1.67279e-05	322
199902	199741	-	0	1574	0	0	162
200213	200196	-	53	467	0.815385	1	18
201615	201534	-	32	740	0.906067	1	82
207902	208051	+	111	543	0.705423	1	150
210191	210213	+	581	56	0.0478783	0.859842	23
229797	229934	+	487	152	0.858005	1	138
239135	239091	-	837	1298	0.440309	1	45
241303	241450	+	1204	547	0.184902	1	148
248857	248914	+	11770	2430	0.0108291	0.240626	58
251763	251645	-	39	424	0.838844	1	119
252045	252200	+	378	820	0.523099	1	156
252976	252863	-	142	445	0.610555	1	114
253012	253127	+	418	118	0.871109	1	116
282759	282808	+	391	104	0.876985	1	50
282808	282658	-	792	190	0.882472	1	151
286098	286148	+	921	216	0.891253	1	51
317855	317693	-	1199	299	0.885098	1	163
321745	321826	+	2227	25	9.17014e-09	6.16515e-07	82
322271	322385	+	429	16	0.97924	1	115
323351	322962	-	80	1635	0.614696	1	390
324953	325042	+	892	54	0.95373	1	90
327509	327285	-	2247	2753	0.365216	1	225
336623	337006	+	77	492	0.756404	1	384
339134	339314	+	121	556	0.695699	1	181
339411	339562	+	50	591	0.839028	1	152
339824	339981	+	52	1122	0.95334	1	158
353243	353267	+	441	30	0.0344337	0.65424	25
369019	369062	+	0	496	1	1	44
370805	370772	-	2562	61	0.982298	1	34
373459	373530	+	16	457	0.929606	1	72
374227	374367	+	17	449	0.911757	1	141
374754	374870	+	17	464	0.919369	1	117
391448	391429	-	72	488	0.775933	1	20
395014	395213	+	252	718	0.59004	1	200
413959	413894	-	37	548	0.873337	1	66
414853	414880	+	227	401	0.473685	1	28
415882	416013	+	97	383	0.656312	1	132
416868	416728	-	88	477	0.718791	1	141
417830	417956	+	58	500	0.801545	1	127
419632	419688	+	34	465	0.868184	1	57
419861	420008	+	19	991	0.00203176	0.0641839	148
424933	425084	+	226	1549	0.764268	1	152
431675	431827	+	493	1540	0.599691	1	153
433285	433390	+	138	566	0.664812	1	106
436675	436527	-	533	583	0.355359	1	149
440571	440632	+	0	454	0.0022586	0.0697067	62
443849	444008	+	1270	646	0.79122	1	160
444927	445333	+	1146	1503	0.381364	1	407
445188	445034	-	114	1145	0.823079	1	155
446987	447219	+	1831	1552	0.287672	1	233
454981	455028	+	59	794	0.863595	1	48
458529	458426	-	560	59	0.936644	1	104
463484	463473	-	1966	3689	0.4888	1	12
465623	465472	-	52	1001	0.872772	1	152
481482	481269	-	62	1186	0.131729	1	214
481865	481777	-	30	457	0.876255	1	89
484085	483807	-	1113	1290	0.344491	1	279
491565	491621	+	391	82	0.898177	1	57
498188	498328	+	476	24	0.968282	1	141
514121	514343	+	396	1068	0.564345	1	223
537397	537378	-	53	397	0.791108	1	20
542404	542556	+	0	505	0	0	153
542931	543027	+	17	480	0.924704	1	97
566413	566562	+	34	462	0.863349	1	150
571081	571221	+	92	420	0.686537	1	141
571362	571273	-	782	114	0.926746	1	90
571799	571809	+	142	421	0.603367	1	11
572436	572689	+	123	1198	0.808299	1	254
572915	573072	+	16	712	0.202105	1	158
573277	573427	+	68	516	0.775266	1	151
599324	599479	+	4591	153	2.55611e-12	2.03095e-10	156
605459	605554	+	84	411	0.706413	1	96
618503	618886	+	54	664	0.839575	1	384
618968	619341	+	7	465	9.19455e-05	0.00430502	374
620532	620676	+	14	681	0.622736	1	145
621305	621376	+	160	423	0.569772	1	72
623562	623506	-	428	218	0.793292	1	57
625964	625990	+	553	16	0.976934	1	27
632416	632347	-	902	877	0.329021	1	70
637363	637524	+	23770	84439	0.754327	1	162
645803	645943	+	59	685	0.832919	1	141
661905	661749	-	75	729	0.803403	1	157
666237	666217	-	105	631	0.751442	1	21
667327	667258	-	483	813	0.460162	1	70
668797	668773	-	2	748	0.991519	1	25
677426	677575	+	17	912	0.00453941	0.121622	150
684243	684363	+	513	262	0.790033	1	121
700331	700481	+	1472	1035	0.712138	1	151
709038	709021	-	483	193	0.829498	1	18
711971	711921	-	39	1455	0.934127	1	51
714917	714714	-	619	1696	0.543217	1	204
714935	715083	+	679	59	0.94811	1	149
732887	732746	-	820	52	0.00695978	0.172156	142
745976	746135	+	383	628	0.451529	1	160
746905	746793	-	102	425	0.669477	1	113
755065	755298	+	566	599	0.645478	1	234
755833	755894	+	15	427	0.918813	1	62
756291	756427	+	17	489	0.916589	1	137
757335	757470	+	17	590	0.923635	1	136
757984	758123	+	0	464	2.53173e-39	5.53182e-37	140
762961	762811	-	112	493	0.685511	1	151
767987	767912	-	17	589	0.936706	1	76
771833	771684	-	28	1602	0.000923923	0.0327368	150
777938	777981	+	603	95	0.92201	1	44
778298	778334	+	391	60	0.926615	1	37
794031	794346	+	98	1560	0.848352	1	316
814448	814340	-	501	199	0.828281	1	109
822602	822626	+	76	557	0.786419	1	25
828939	828853	-	182	469	0.564814	1	87
829361	829194	-	60	686	0.824872	1	168
829525	829459	-	35	398	0.845696	1	67
831255	831395	+	58	540	0.808208	1	141
833683	833887	+	185	961	0.720147	1	205
841343	841190	-	659	309	0.806352	1	154
846573	846988	+	438	590	0.374847	1	416
847069	847212	+	183	471	0.564959	1	144
847430	847196	-	14746	3742	0.0647429	1	235
847712	848018	+	94	481	0.716744	1	307
870852	870707	-	0	603	0	0	146
886973	886950	-	0	407	1	1	24
890408	890254	-	269	1605	0.736256	1	155
913193	913097	-	17	447	0.919892	1	97
913562	913630	+	58	467	0.800051	1	69
920277	920204	-	419	329	0.710898	1	74
921225	920958	-	538	182	0.147051	1	268
925886	926034	+	146	666	0.693955	1	149
953659	953565	-	0	506	0	0	95
955333	955713	+	414	1104	0.511109	1	381
955805	955460	-	78	778	0.814559	1	346
956095	955951	-	201	487	0.550324	1	145
956650	956411	-	5182	413	6.30451e-06	0.000351711	240
957133	957283	+	220	758	0.633228	1	151
957791	957943	+	33	481	0.871197	1	153
962049	961899	-	648	58	0.946652	1	151
976914	976763	-	163	837	0.718258	1	152
980127	979970	-	709	46	0.0100138	0.224411	158
984366	984210	-	70	827	0.82457	1	157
985761	985608	-	1113	343	0.134039	1	154
1006100	1006129	+	3002	76	0.108742	1	30
1017106	1017243	+	98	395	0.659611	1	138
1020086	1020071	-	538	66	0.0593624	1	16
1021924	1022111	+	391	360	0.31677	1	188
1022550	1022536	-	88	463	0.727352	1	15
1025841	1025990	+	720	913	0.602866	1	150
1028698	1028712	+	1557	5	0.997424	1	15
1031165	1031411	+	154	609	0.664795	1	247
1032738	1033102	+	166	769	0.678082	1	365
1033385	1033920	+	431	1639	0.570293	1	536
1034479	1034732	+	216	748	0.634406	1	254
1072433	1072283	-	5857	346	0.000808949	0.0290557	151
1076558	1076667	+	834	38	0.303749	1	110
1077457	1077307	-	32	560	0.886167	1	151
1081512	1081382	-	391	131	0.850426	1	131
1082175	1082322	+	528	72	0.931858	1	148
1086851	1086951	+	78	479	0.748885	1	101
1098330	1098243	-	159	448	0.582453	1	88
1108219	1108089	-	452	62	0.924582	1	131
1112942	1112839	-	408	17	0.978087	1	104
1115891	1115735	-	20535	9786	0.724471	1	157
1116242	1116159	-	8857	15806	0.424243	1	84
1119723	1119714	-	35	888	0.922309	1	10
1121544	1121460	-	87	3753	0.000325061	0.0131125	85
1121773	1121910	+	61	447	0.775002	1	138
1122012	1122212	+	130	989	0.786389	1	201
1128344	1128282	-	637	583	0.679237	1	63
1130181	1130034	-	479	31	0.954167	1	148
1139141	1139258	+	69	416	0.745677	1	118
1172616	1172466	-	345	1361	0.662952	1	151
1177731	1177864	+	35	514	0.87235	1	134
1188077	1187927	-	1401	2258	0.41146	1	151
1197179	1197190	+	611	193	0.861204	1	12
1199031	1198987	-	475	141	0.864479	1	45
1201709	1201683	-	25	549	0.903017	1	27
1209225	1209197	-	0	412	1	1	29
1217188	1217042	-	441	187	0.818115	1	147
1217837	1217931	+	423	98	0.89169	1	95
1218181	1218333	+	335	866	0.565946	1	153
1219123	1219154	+	69	403	0.746384	1	32
1221161	1221006	-	6835	616	0.000195152	0.00825303	156
1224297	1224368	+	649	159	0.886904	1	72
1229347	1229264	-	5	398	0.00223317	0.0697067	84
1231145	1231029	-	54	474	0.807977	1	117
1232060	1231900	-	212	1633	0.778359	1	161
1249294	1249517	+	37	1479	0.000302172	0.0123796	224
1251399	1251522	+	36	531	0.873976	1	124
1257406	1257195	-	538	760	0.575295	1	212
1257994	1257840	-	20391	9343	0.846826	1	155
1258345	1258262	-	8897	15328	0.416532	1	84
1263482	1263393	-	505	2082	0.673958	1	90
1265124	1265172	+	63	464	0.784808	1	49
1265389	1265412	+	17	446	0.920518	1	24
1266100	1266277	+	72	629	0.789783	1	178
1266413	1266541	+	153	451	0.598	1	129
1273712	1273532	-	761	49	0.955476	1	181
1273851	1273832	-	391	33	0.0413228	0.752419	20
1281252	1281279	+	840	18	0.984634	1	28
1284789	1284939	+	5963	3911	0.234675	1	151
1285739	1285587	-	363	789	0.523007	1	153
1294445	1294348	-	0	389	2.82914e-13	2.47267e-11	98
1295038	1294877	-	36	1452	0.00902109	0.207485	162
1300050	1300189	+	0	493	0	0	140
1304410	1304260	-	318	1149	0.64489	1	151
1319866	1319899	+	21	414	0.891676	1	34
1327709	1327555	-	2492	1581	0.243099	1	155
1336165	1336112	-	253	406	0.447044	1	54
1337105	1337076	-	538	163	0.863537	1	30
1341560	1341367	-	1006	46	0.00756928	0.182079	194
1342266	1342022	-	2097	489	0.859906	1	245
1343584	1343520	-	2404	27	3.28287e-05	0.00165532	65
1345398	1345421	+	897	41	0.976492	1	24
1348908	1348841	-	1096	62	0.960348	1	68
1350467	1350398	-	37	473	0.858657	1	70
1353474	1353451	-	523	274	0.787282	1	24
1372496	1372437	-	61	581	0.821701	1	60
1376314	1376399	+	17	411	0.917412	1	86
1385690	1385544	-	210	748	0.640619	1	147
1389198	1389092	-	372	469	0.39083	1	107
1397889	1397901	+	467	35	0.960793	1	13
1400050	1400093	+	56	413	0.784407	1	44
1408503	1408353	-	1165	325	0.124634	1	151
1416185	1416082	-	14	452	0.934605	1	104
1418659	1418563	-	480	338	0.733276	1	97
1419626	1419474	-	479	1224	0.562929	1	153
1419715	1419893	+	45	716	0.860617	1	179
1428762	1428902	+	431	370	0.303693	1	141
1433787	1433645	-	17	424	0.909992	1	143
1453237	1453025	-	116	506	0.685803	1	213
1453572	1453422	-	48	598	0.84475	1	151
1454063	1453869	-	156	2183	0.842688	1	195
1458904	1459051	+	20	663	0.923395	1	148
1465196	1465165	-	9607	32	1.22382e-20	1.68888e-18	32
1466066	1466215	+	143	496	0.634355	1	150
1481120	1480593	-	204	3724	0.000533063	0.0205543	528
1482008	1481928	-	17	386	0.91256	1	81
1482403	1482641	+	169	1358	0.781078	1	239
1482456	1482430	-	17	406	0.912692	1	27
1482716	1482518	-	290	1209	0.663183	1	199
1482790	1482932	+	53	439	0.795083	1	143
1501021	1501049	+	35	397	0.849017	1	29
1507266	1507150	-	735	109	0.924604	1	117
1520704	1520775	+	112	1139	0.820491	1	72
1538263	1538185	-	25	414	0.88822	1	79
1546617	1546805	+	166	1766	0.817338	1	189
1549015	1548960	-	70	474	0.772195	1	56
1551210	1551175	-	0	408	1	1	36
1554010	1554035	+	88	401	0.696535	1	26
1554096	1554107	+	88	397	0.695844	1	12
1569987	1570137	+	602	1531	0.562019	1	151
1570253	1570402	+	177	1287	0.779293	1	150
1585945	1586095	+	17	590	0.918063	1	151
1586844	1586745	-	490	92	0.909242	1	100
1592114	1592095	-	25	685	0.920612	1	20
1594758	1594611	-	95	432	0.684007	1	148
1594965	1594816	-	88	1636	0.253347	1	150
1601246	1601392	+	601	44	0.948587	1	147
1601594	1601746	+	360	1017	0.587791	1	153
1602510	1602579	+	17	416	0.91893	1	70
1603423	1603308	-	208	511	0.554118	1	116
1608600	1608487	-	70	529	0.781915	1	114
1614211	1614452	+	17918	10834	0.211887	1	242
1614807	1615312	+	313	1118	0.557298	1	506
1615493	1615640	+	29	499	0.885624	1	148
1615737	1615995	+	36	916	0.0283907	0.551747	259
1616104	1616379	+	127	852	0.761329	1	276
1616504	1616659	+	59	873	0.851027	1	156
1625158	1625019	-	28	488	0.885964	1	140
1625561	1625411	-	35	644	0.888572	1	151
1627322	1627176	-	62	520	0.792836	1	147
1629389	1629346	-	223	942	0.674811	1	44
1643067	1642949	-	51	462	0.812198	1	119
1643242	1643152	-	35	429	0.850832	1	91
1648981	1648803	-	490	730	0.433072	1	179
1649576	1649412	-	18870	9140	0.886243	1	165
1649921	1649838	-	8092	15801	0.44841	1	84
1655057	1654968	-	617	2190	0.64	1	90
1655716	1655726	+	17	397	0.918157	1	11
1656321	1656364	+	61	412	0.771414	1	44
1658491	1658342	-	1009	442	0.179054	1	150
1672524	1672675	+	16	757	0.0166816	0.358517	152
1695378	1695517	+	142	471	0.624737	1	140
1712644	1712495	-	140	1400	0.822897	1	150
1715262	1715218	-	95	440	0.700676	1	45
1715465	1715314	-	716	1032	0.570346	1	152
1748089	1748309	+	937	1004	0.63201	1	221
1748901	1749052	+	16	711	0.379896	1	152
1751146	1751062	-	470	340	0.726952	1	85
1763022	1762826	-	1562	2157	0.38128	1	197
1776000	1776064	+	482	74	0.92213	1	65
1786698	1786843	+	756	266	0.841584	1	146
1788239	1788089	-	843	213	0.87726	1	151
1789785	1789803	+	54	810	0.88029	1	19
1789923	1790074	+	17	801	0.0148477	0.324423	152
1794828	1794980	+	1945	300	0.915976	1	153
1801980	1801914	-	271	3336	0.845266	1	67
1808897	1808873	-	1653	1017	0.757714	1	25
1830718	1830867	+	147	598	0.67037	1	150
1831103	1831228	+	496	335	0.742161	1	126
1831315	1831353	+	189	426	0.533769	1	39
1831415	1831565	+	141	490	0.635066	1	151
1836136	1836115	-	391	82	0.0971846	1	22
1843719	1843465	-	48	1027	0.035079	0.656979	255
1844931	1844780	-	291	628	0.520885	1	152
1847700	1847635	-	35	444	0.858177	1	66
1847831	1847791	-	17	399	0.902857	1	41
1848649	1848314	-	772	1976	0.507268	1	336
1848739	1848726	-	391	49	0.0607953	1	14
1850773	1850746	-	242	501	0.512703	1	28
1859093	1858970	-	504	25	0.969082	1	124
1861733	1861713	-	1530	248	0.91827	1	21
1871574	1871400	-	89	626	0.766093	1	175
1872062	1871830	-	209	2968	0.928644	1	233
1872722	1872564	-	20017	9918	0.776658	1	159
1873073	1872990	-	8580	15722	0.43153	1	84
1878561	1878548	-	53	551	0.833474	1	14
1886258	1886103	-	87	809	0.794072	1	156
1886773	1886893	+	71	397	0.731333	1	121
1890491	1890335	-	271	989	0.648412	1	157
1910174	1910388	+	10106	4400	0.787789	1	215
1914343	1914508	+	102	728	0.773897	1	166
1914658	1914725	+	67	509	0.790409	1	68
1922098	1922248	+	1025	322	0.138288	1	151
1929631	1929781	+	241	626	0.567206	1	151
1930098	1930128	+	79	419	0.729104	1	31
1930544	1930595	+	213	461	0.521483	1	52
1931844	1931864	+	17	397	0.91501	1	21
1942242	1942336	+	85	447	0.718854	1	95
1962023	1962042	+	14	434	0.934249	1	20
1976122	1975954	-	9573	131	5.24535e-78	1.37533e-75	169
1996364	1996568	+	858	295	0.146077	1	205
1996915	1996884	-	408	16	0.980055	1	32
2013845	2013995	+	0	510	0	0	151
2014588	2014762	+	152	1021	0.766464	1	175
2015473	2015647	+	103	1161	0.836729	1	175
2016741	2016864	+	0	451	1.55378e-29	2.716e-27	124
2038113	2037834	-	440	1382	0.57224	1	280
2038464	2038692	+	123	1927	0.855099	1	229
2038828	2039002	+	517	1971	0.629576	1	175
2039110	2039247	+	39	432	0.839534	1	138
2040507	2040650	+	35	488	0.866883	1	144
2040877	2041019	+	119	518	0.683077	1	143
2041247	2041439	+	28	1238	0.00607342	0.154607	193
2042478	2042628	+	0	568	0	0	151
2043068	2043303	+	62	551	0.79167	1	236
2072489	2072505	+	460	88	0.0890005	1	17
2072798	2072887	+	657	25	0.974569	1	90
2083244	2083254	+	391	16	0.979537	1	11
2091115	2091159	+	68	425	0.756895	1	45
2097143	2096997	-	510	398	0.282847	1	147
2101781	2101559	-	1485	221	0.91861	1	223
2102770	2102684	-	1283	249	0.901015	1	87
2112384	2112344	-	0	405	1	1	41
2112585	2112565	-	0	424	1	1	21
2112906	2112758	-	17	521	0.92022	1	149
2114332	2114189	-	91	638	0.75878	1	144
2120892	2121042	+	253	677	0.574135	1	151
2136684	2136851	+	85	469	0.718897	1	168
2146277	2146383	+	53	427	0.797103	1	107

## Sheet: FA 1090; LJ001; LJ002 Growth Cu
Growth curve examples are typical respresentatives of FA 1090, LJ001 and LJ002 strains
Reference
J Bacteriol. 2013 Nov;195(22):5166-73. doi: 10.1128/JB.00839-13. Epub 2013 Sep 13.
Bacterial Strains and Growth Conditions. FA 1090 was grown from frozen stock cultures on GCB agar (Becton Dickinson) supplemented with 2% IsoVitaleX (Becton Dickinson) under 5% CO2 atmosphere at 37°C. Fe-deplete (CDM-0) and Fe-replete medium (CDM-10, supplemented with 10 mM Fe (NO3)3 were prepared as previously reported. Briefly, organisms were inoculated to an OD600 = 0.100 from overnight growth…
